# Supplementary material
Source: Research Square preprint supplement (doi:10.21203/rs.3.rs-9441072/v1)
Supplement: Supplementary file 1 [file b61ca4d2b758e7c8d2a84f7c.xlsx]

## Sheet: Foglio1
Compound	Chemical Class	S1A	S1B	S2A	S2B	S3A	S3B	S5A	S5B	S6A	S6B	S7A	S7B	S8A	S8B	S4A	S4B	S9A	S9B	S10A	S10B	P1A	P1B	P2A	P2B	P3A	P3B	St1A	St1B	St2A	St2B
		Samples	Samples	Samples	Samples	Samples	Samples	Samples	Samples	Samples	Samples	Samples	Samples	Samples	Samples	Samples	Samples	Samples	Samples	Stigma	Stigma	Petals	Petals	Petals	Petals	Petals+Stamen	Petals+Stamen	Stamen	Stamen	Stamen	Stamen
Delphinidin 3,5-O-diglucoside	Anthocyanines	0	0	0	0	0	0	0	0	0	0	6969	6609	0	0	0	0	17447	16418	0	0	445822	498702	632343	649476	87598	92643	18579	13796	3774	2945
Cyanidin 3,5-O-diglucoside	Anthocyanines	0	0	0	0	0	0	0	0	0	0	0	0	0	0	0	0	0	0	0	0	7812	11583	30974	23469	0	0	0	0	0	0
Petunidin 3,5-O-diglucoside (Petunin)	Anthocyanines	0	0	0	0	0	0	0	0	0	0	21952	19318	340	746	0	0	5136	1753	0	0	557668	529596	639094	628319	15492	26870	11025	10395	2335	977
Delphinidin 3-O-glucoside	Anthocyanines	0	0	0	0	0	0	0	0	0	0	2552	2816	0	0	0	0	0	0	0	0	241942	243428	327984	288733	18379	25897	36341	31986	26448	16162
Pelargonidin 3,5-O-diglucoside	Anthocyanines	0	0	0	0	0	0	0	0	0	0	0	0	0	0	0	0	0	0	0	0	2799	3025	7736	7087	0	0	0	0	0	0
Malvidin 3,5-diglucoside (Malvin)	Anthocyanines	0	0	0	0	0	0	0	0	0	0	806103	676706	0	0	0	0	0	0	0	0	89157	94020	98901	79130	2087	1670	0	0	0	0
Petunidin 3-O-glucoside	Anthocyanines	0	0	0	0	0	0	0	0	0	0	5601	4979	0	0	0	0	1543	814	0	0	82013	81673	86200	72327	1622	2239	12244	14192	12820	13341
Malvidin 3-O-glucoside (Oenin)	Anthocyanines	0	0	0	0	0	0	0	0	0	0	26312	21768	0	0	0	0	0	0	0	0	13053	14227	8436	8174	0	0	0	0	0	0
Pelargonidin	Anthocyanines	0	0	0	0	0	0	0	0	0	0	0	0	0	0	0	0	0	0	0	0	1484	1318	3461	3236	1709	2003	0	0	0	0
Quercetin 3,7,4'-triglucoside	Flavonoids	18719	18762	2344	17782	19030	17405	6444	21502	19895	18773	8334	8500	30423	30142	2986	2498	19900	18451	12778	15668	66317	70788	125163	115098	88582	85573	91190	82436	113091	107466
Kaempferol 3-O-sophoroside 7-O-glucoside	Flavonoids	1197751	1309032	2875918	2509353	2709990	2394005	0	1781043	1441818	1360031	578704	564864	4322434	4695669	259646	434373	1251012	1289041	2405683	2624458	2809008	2836283	3473351	3418959	2689291	2613108	141432	113315	88768	82811
Kaempferol 3-O-sophoroside-7-O-rhamnoside	Flavonoids	20367	22840	53932	48986	54891	48962	0	32037	27179	24123	7743	7660	113038	118772	12719	7836	18132	18861	46655	47456	34575	35273	51745	42702	28100	27094	24949	23368	25947	25647
Quercetin diglucoside isomer A	Flavonoids	7652	9645	8680	8212	17394	15765	6517	6827	6463	6593	1316	1780	11508	12618	1447	780	5624	5820	6064	5815	0	0	15901	13952	26139	25568	0	0	0	0
Kaempferol-3,7-di-O-β-D-glucoside	Flavonoids	130648	141016	286172	263832	312396	286022	192372	192570	151758	142340	49452	49518	0	0	75019	49549	128296	129084	78618	322383	259539	277093	319536	306280	331727	304942	15031	12509	9343	7384
Kaempferol 3,7,4'-O-triglucoside	Flavonoids	179304	197076	327106	298298	544211	466487	278610	275911	223288	211284	49311	52405	957450	702386	104592	67103	126169	132709	499993	517008	55936	56034	86721	79436	102009	90219	14440	9925	10208	11834
Kaempferol diglycoside isomer	Flavonoids	0	0	0	0	904	637	0	0	0	0	311601	287229	0	0	0	0	0	0	0	0	0	0	0	0	0	0	0	0	0	0
Quercetin diglucoside isomer B	Flavonoids	7961	8091	1859	1722	6142	5703	6582	6340	6406	6833	1882	1620	3334	3663	583	376	2147	2110	1746	2150	2193	2286	4014	3416	11226	13651	0	0	0	0
Kaempferol 3-(6''-acetylglycoside)-7-glycoside isomer A	Flavonoids	1086	1006	3133	2070	2292	3999	745	523	1107	1165	7473	7519	10364	11668	577	176	10155	13465	2970	7655	97604	117077	117455	106828	63448	66128	1622	976	0	0
Kaempferol triglucoside isomer	Flavonoids	36053	40292	47073	42806	113587	108441	48725	50192	37682	39355	16423	16902	124525	132349	15250	10200	29944	30641	30116	33269	30537	33101	62825	66321	92276	95104	4856	5215	6206	8412
Quercetin 3-O-sophoroside	Flavonoids	49300	53933	84460	74448	336833	317853	77181	80461	63246	61058	206971	195095	473774	502100	42899	10886	277611	368100	43485	95842	1146500	1205333	1824727	1626528	1693051	1047952	1076839	994742	748142	722390
Kaempferol 7-O-sophoroside	Flavonoids	58951	63887	102247	86202	203825	205129	89715	87144	68569	64957	45086	43382	253255	284302	38665	24745	71557	79093	102386	119897	117640	165915	74812	69859	144301	125881	332615	289483	59938	55822
Isorhamnetin 3,7-diglucoside	Flavonoids	6236	5722	7594	7193	20411	22849	9629	9032	7660	8015	12905	11332	27516	27015	18730	12949	64014	75246	9411	19856	151157	205968	95865	76038	155140	154397	947849	443668	92484	84235
Kaempferol 3-O-sophoroside	Flavonoids	2086548	2401214	2664061	2384529	5342638	4938511	2769035	2732346	2241916	2104733	2227193	2306760	6026560	6645033	1217730	800858	4143450	4196043	2909070	3686874	9927727	10629169	12266236	11958001	10671901	10114959	758572	682471	514950	505226
Isorhamnetin 3-O-sophoroside	Flavonoids	1385	1411	1870	1851	5566	6143	2051	1747	1421	1924	3926	3254	7294	6730	2362	2067	12195	14373	3561	4578	19060	24553	2383	8967	31611	41942	259544	255509	242919	229162
Isovitexin (Apigenin 6-glucoside)	Flavonoids	303	618	995	1190	1388	3467	0	0	203	740	3221	2751	0	0	787	513	825	716	250	896	1091	1023	5114	4847	3121	2667	0	0	0	0
Kaempferol 3-O-rutinoside	Flavonoids	26138	30200	36165	31947	98824	88138	40528	41922	29976	27967	20381	18344	127659	135837	15929	8611	45024	45037	35419	38963	147175	154498	210368	180757	151072	154537	102310	104439	106928	95548
Isorhamnetin 4'-neohesperidoside	Flavonoids	42924	51924	75211	70107	216265	201235	80203	77150	63997	62224	95224	89462	265621	285190	37306	21470	195550	207301	28350	57984	211666	315158	162617	153289	353011	354527	1736166	1499830	1503597	1376372
Luteolin 7-O-rutinoside	Flavonoids	0	0	707	0	0	1430	0	0	787	0	668720	594547	1646	3349	0	0	3163	3103	0	0	0	0	0	0	0	0	775	750	0	0
Quercetin acetylhexoside isomer A	Flavonoids	0	0	0	0	0	0	0	0	0	0	3330	1162	637	1219	0	0	2493	1146	0	0	11853	11738	10144	8722	2964	2162	3712	3108	2305	2400
Apigenin diglucoside isomer	Flavonoids	0	0	0	0	0	0	0	0	0	0	0	0	0	0	0	0	0	0	0	0	17525	19035	34853	35886	21865	21895	0	0	0	0
Isorhamnetin 3-O-rutinoside	Flavonoids	422	131	0	0	0	0	0	0	0	0	60065	53154	0	0	0	0	0	0	0	0	0	0	0	0	0	0	0	0	0	0
Kaempferol 3-(6''-acetylglycoside)-7-glycoside isomer B	Flavonoids	52296	60287	77120	68232	135793	132753	79833	77877	56633	53266	112946	108097	164642	177078	28258	18991	295997	281473	116790	175456	1787033	1909336	2570988	2427876	1231981	1296538	15349	15483	5284	4686
Kaempferol 3-O-glucoside	Flavonoids	54253	60407	62299	52178	157604	145152	79177	80374	58592	58065	113497	110834	128285	126604	29491	19245	178986	179226	63377	71190	1611108	1896841	1644013	1763923	1176237	1148926	52547	44634	31638	29612
Isorhamnetin 3-O-glucoside	Flavonoids	0	0	4082	3979	19928	19942	7461	5999	4373	6360	8261	6594	18601	21505	2583	1398	10142	12741	0	0	18078	24448	10768	10397	49782	76027	173372	156827	71815	70895
Kaempferol 7-O-glucoside	Flavonoids	29782	32352	37051	35938	27880	24511	49133	49382	39114	33292	115948	106413	22394	24534	10987	7842	15056	15499	25691	24796	45555	45803	48689	46648	50845	47237	919	212	0	0
Quercetin acetylhexoside isomer B	Flavonoids	0	0	0	0	0	0	0	0	0	0	565	657	590	1622	0	0	1875	605	0	0	20661	20655	19250	15708	4775	4847	3500	3558	5665	4142
Apigenin 7-glucoside	Flavonoids	3520	2694	9514	8641	8551	6670	4122	4365	3623	3795	618964	378511	9305	10465	3309	2481	3610	2128	2777	2607	1994	1981	22455	19754	4943	5127	0	0	0	0
Kaempferol hexoside isomer	Flavonoids	3987	4425	4983	3910	8333	7439	7673	6939	6132	5228	10306	10010	8469	1873702	2312	1770	3300	4007	8667	8936	0	0	0	0	0	0	0	0	0	0
Dihydrokaempferol	Flavonoids	4495	4303	5417	4687	16030	12242	6097	5472	4474	3550	13646	12636	8883	10933	974	992	1839	2250	12234	7955	4239	4662	3189	2948	5335	6243	0	0	0	0
Kaempferol 3-(6''-acetylglycoside) isomer	Flavonoids	7203	11046	11854	11543	27201	21975	11674	11108	9270	8150	0	0	24990	24874	3708	2894	18715	19123	12525	17005	231541	239389	198233	180175	99715	98678	3919	2936	747	645
Luteolin	Flavonoids	0	0	0	0	0	0	0	0	0	0	9082	8273	0	0	0	0	0	0	0	0	0	0	0	0	0	0	0	0	0	0
Quercetin	Flavonoids	831	505	998	664	4238	3680	0	0	572	443	1105	865	4910	4924	0	0	3078	3075	0	0	4645	4912	3081	2657	8346	9462	9252	9910	11774	10725
Naringenin	Flavonoids	1061	0	211	685	2915	2564	1182	294	543	286	8817	8198	2303	2843	0	0	1347	2104	2246	1258	990	1158	2919	2871	3988	4051	0	0	0	0
Kaempferol	Flavonoids	11078	0	18311	16193	42670	39990	17038	18143	10986	10760	6080	6110	27260	30343	6610	3810	13326	13553	16851	17371	48368	49717	26773	24315	62505	65022	4074	3916	3020	3058
Isorhamnetin	Flavonoids	2029	2873	5990	4860	19878	17110	3406	2855	2280	2199	2090	2180	17369	20083	3335	1924	7021	7101	995	1316	2967	3720	1462	1338	8108	12071	25448	23268	15388	16575
Picrocrocinic acid	Crocins	30325	28242	45556	46471	59428	61976	45794	45073	29586	31357	14854	14981	42024	41024	870017	644040	952565	987811	1585049	1981869	734	1190	1318	1272	46578	17562	36051	10409	4037	18257
Picrocrocin	Crocins	549584	526449	728284	675725	687330	698340	569971	532599	495725	526440	150009	144429	843684	839035	870017	644040	952565	987811	1585049	1981869	734	1190	1318	1272	198750	24461	36051	10409	4037	18257
trans-5-tG	Crocins	99162	102173	129804	136136	170294	176058	111138	109210	101766	104188	23753	21700	261069	257350	352944	255949	363461	380362	675427	650037	0	0	0	0	58807	0	36075	0	3390	12882
trans-5-nG	Crocins	94294	59405	127581	121840	226422	234102	99581	92737	54048	86633	12511	17430	199193	196575	320049	160967	282842	294493	453279	419450	0	0	0	0	79650	0	0	0	0	26235
cis-5-tG	Crocins	47316	44089	38138	38997	65958	75753	52918	51761	44407	48474	7615	7019	43644	42390	164153	123827	151394	140742	217785	114135	0	0	0	0	72298	0	0	0	0	16973
trans-Crocin (trans-4-GG)	Crocins	6226613	6707863	9258803	9060404	12269735	11091423	6060225	6798640	7276918	6613902	2593013	2626825	15593320	16085277	5607468	3842882	5893823	6326968	9813776	9972355	8144	4302	3395	11696	1199610	4464	308640	32520	22052	97015
trans-4-tg	Crocins	476521	531612	822685	716382	1457087	1346918	490536	533402	498587	486678	102448	105077	1686366	1873702	661973	340971	375307	691105	1419290	1428225	0	0	0	0	22795	0	25499	433	1777	6648
trans-3-Gg	Crocins	3491701	3951119	4941501	4757485	5742775	5362970	3617413	3931811	3708786	3635399	1403522	1420112	7550699	7692843	2840068	1941125	3059908	2851427	5119376	5325708	4506	1540	2505	6372	444646	2390	116406	17340	5496	51706
trans-4-ng	Crocins	331712	361703	221526	202515	199368	176143	361108	386482	341341	341882	17201	20026	120450	124080	99951	48961	31257	28527	55142	72297	0	0	0	0	2421	0	0	0	0	0
Crocin isomer A	Crocins	383251	430913	524442	504132	673504	609790	411567	431962	419286	452810	186181	203525	866429	1024562	82705	63869	84716	95537	125694	114051	0	0	0	0	19209	0	6725	1256	331	1969
cis-5-nG	Crocins	29940	28616	51616	48763	59108	56686	42033	40976	31033	34239	3479	3025	88440	90095	63150	33387	56673	64031	76678	82810	0	0	0	0	898	0	0	0	0	0
Crocetin diester pentaglycoside isomer A	Crocins	16229	16390	33708	29963	44043	44757	24094	22351	15735	17674	1961	1550	42824	45748	25478	15570	28710	27712	26614	31737	0	0	0	0	1310	0	0	0	0	0
Crocin II isomer A	Crocins	85072	0	174980	148116	222796	158498	140487	150657	94115	86315	30517	32274	179362	280039	29964	19103	27638	35133	38897	49978	0	0	0	0	7226	0	0	0	0	0
Crocetin diester pentaglycoside isomer B	Crocins	13739	13035	23467	18621	29846	30208	21632	20350	14820	14882	810	0	18994	22258	18572	7644	13236	16621	15595	19417	0	0	0	0	924	0	0	0	0	0
cis-Crocin (cis-4-GG)	Crocins	4741981	0	6243619	6415085	6364554	5386069	5438233	4911923	5232955	4996600	1224750	1236100	8214160	8888272	2659496	1582690	2839995	2922657	2826870	2990726	2189	1684	548	1803	62999	1780	9424	1504	4583	18610
Crocin isomer B	Crocins	798338	206723	456444	416940	282438	244212	1260495	1255814	882232	867750	0	10765	180932	208402	294613	130742	54178	54699	66767	65425	0	0	0	0	0	0	0	0	0	0
Crocin isomer C	Crocins	169790	184087	274644	245836	364682	329774	258269	248736	178775	180291	22229	23517	371554	418579	100132	48528	97847	94135	138816	157628	0	0	0	0	1444	0	454	0	0	1073
cis-3-Gg	Crocins	949115	969924	1657199	1577334	1481721	1490624	1153307	1139491	1028517	1074065	180743	164429	1917378	2029935	1446244	849922	1961844	1844545	1942407	2129761	0	0	0	1304	26276	354	3678	0	0	8730
Crocin II isomer B	Crocins	50398	48254	31952	28931	14077	15116	77400	78454	53238	56646	569	0	12116	11838	53977	28100	11576	11531	14235	15836	0	0	0	0	0	0	0	0	0	0
trans-2-gg	Crocins	909515	1006237	1090	1427751	1296584	1173142	1707995	1774433	1133815	1080842	90108	92754	810940	937402	357960	184469	247255	253617	341144	376341	0	0	0	0	11635	0	0	0	0	0
trans-2-G	Crocins	680035	737634	1366972	1152471	993551	906470	1332569	1337147	885474	796969	63794	66073	614808	657440	261581	134879	190115	197125	254215	290266	0	0	0	0	7706	0	0	0	0	0
trans-1-g	Crocins	26202	26959	65339	59032	42597	40958	51312	50733	34899	35956	2432	2644	37471	39342	31962	17666	25296	25746	30287	34334	0	0	0	0	1138	0	0	0	0	0
cis-1-g	Crocins	20589	20562	52478	48158	32009	29504	39767	39370	26460	27545	1816	1987	22349	23638	0	0	0	0	0	0	0	0	0	0	0	0	0	0	0	0
