# Supplementary material
Source: Research Square preprint supplement (doi:10.21203/rs.3.rs-9441072/v1)
Supplement: Supplementary file 1 [file c9553aefbbe5fb54bcdf6acf.docx]

**Supplementary Information**

**Chemical Mapping of *Crocus sativus* L. Floral Parts for Assessing Compositional Consistency and Auto-Adulteration in Saffron-Based Botanicals**

Hilva Gjoni1, Guillem Campmajó1*, Marco Biagi1, Renato Bruni1, Chiara Dall’Asta1

1Department of Food and Drug, University of Parma, Parma, Italy

* Corresponding author: Guillem Campmajó

Department of Food and Drug, University of Parma, Parma, Italy

(e-mail: guillem.campmajogalvan@unipr.it)

**Supplementary Figure 1** Stability of directional projections under compound resampling. Directional scores were recalculated using (i) macro-class block bootstrap resampling (n = 1500) and (ii) feature subsampling without replacement (80% of compounds, n = 500). Points represent mean projections and error bars indicate 95% empirical confidence intervals.


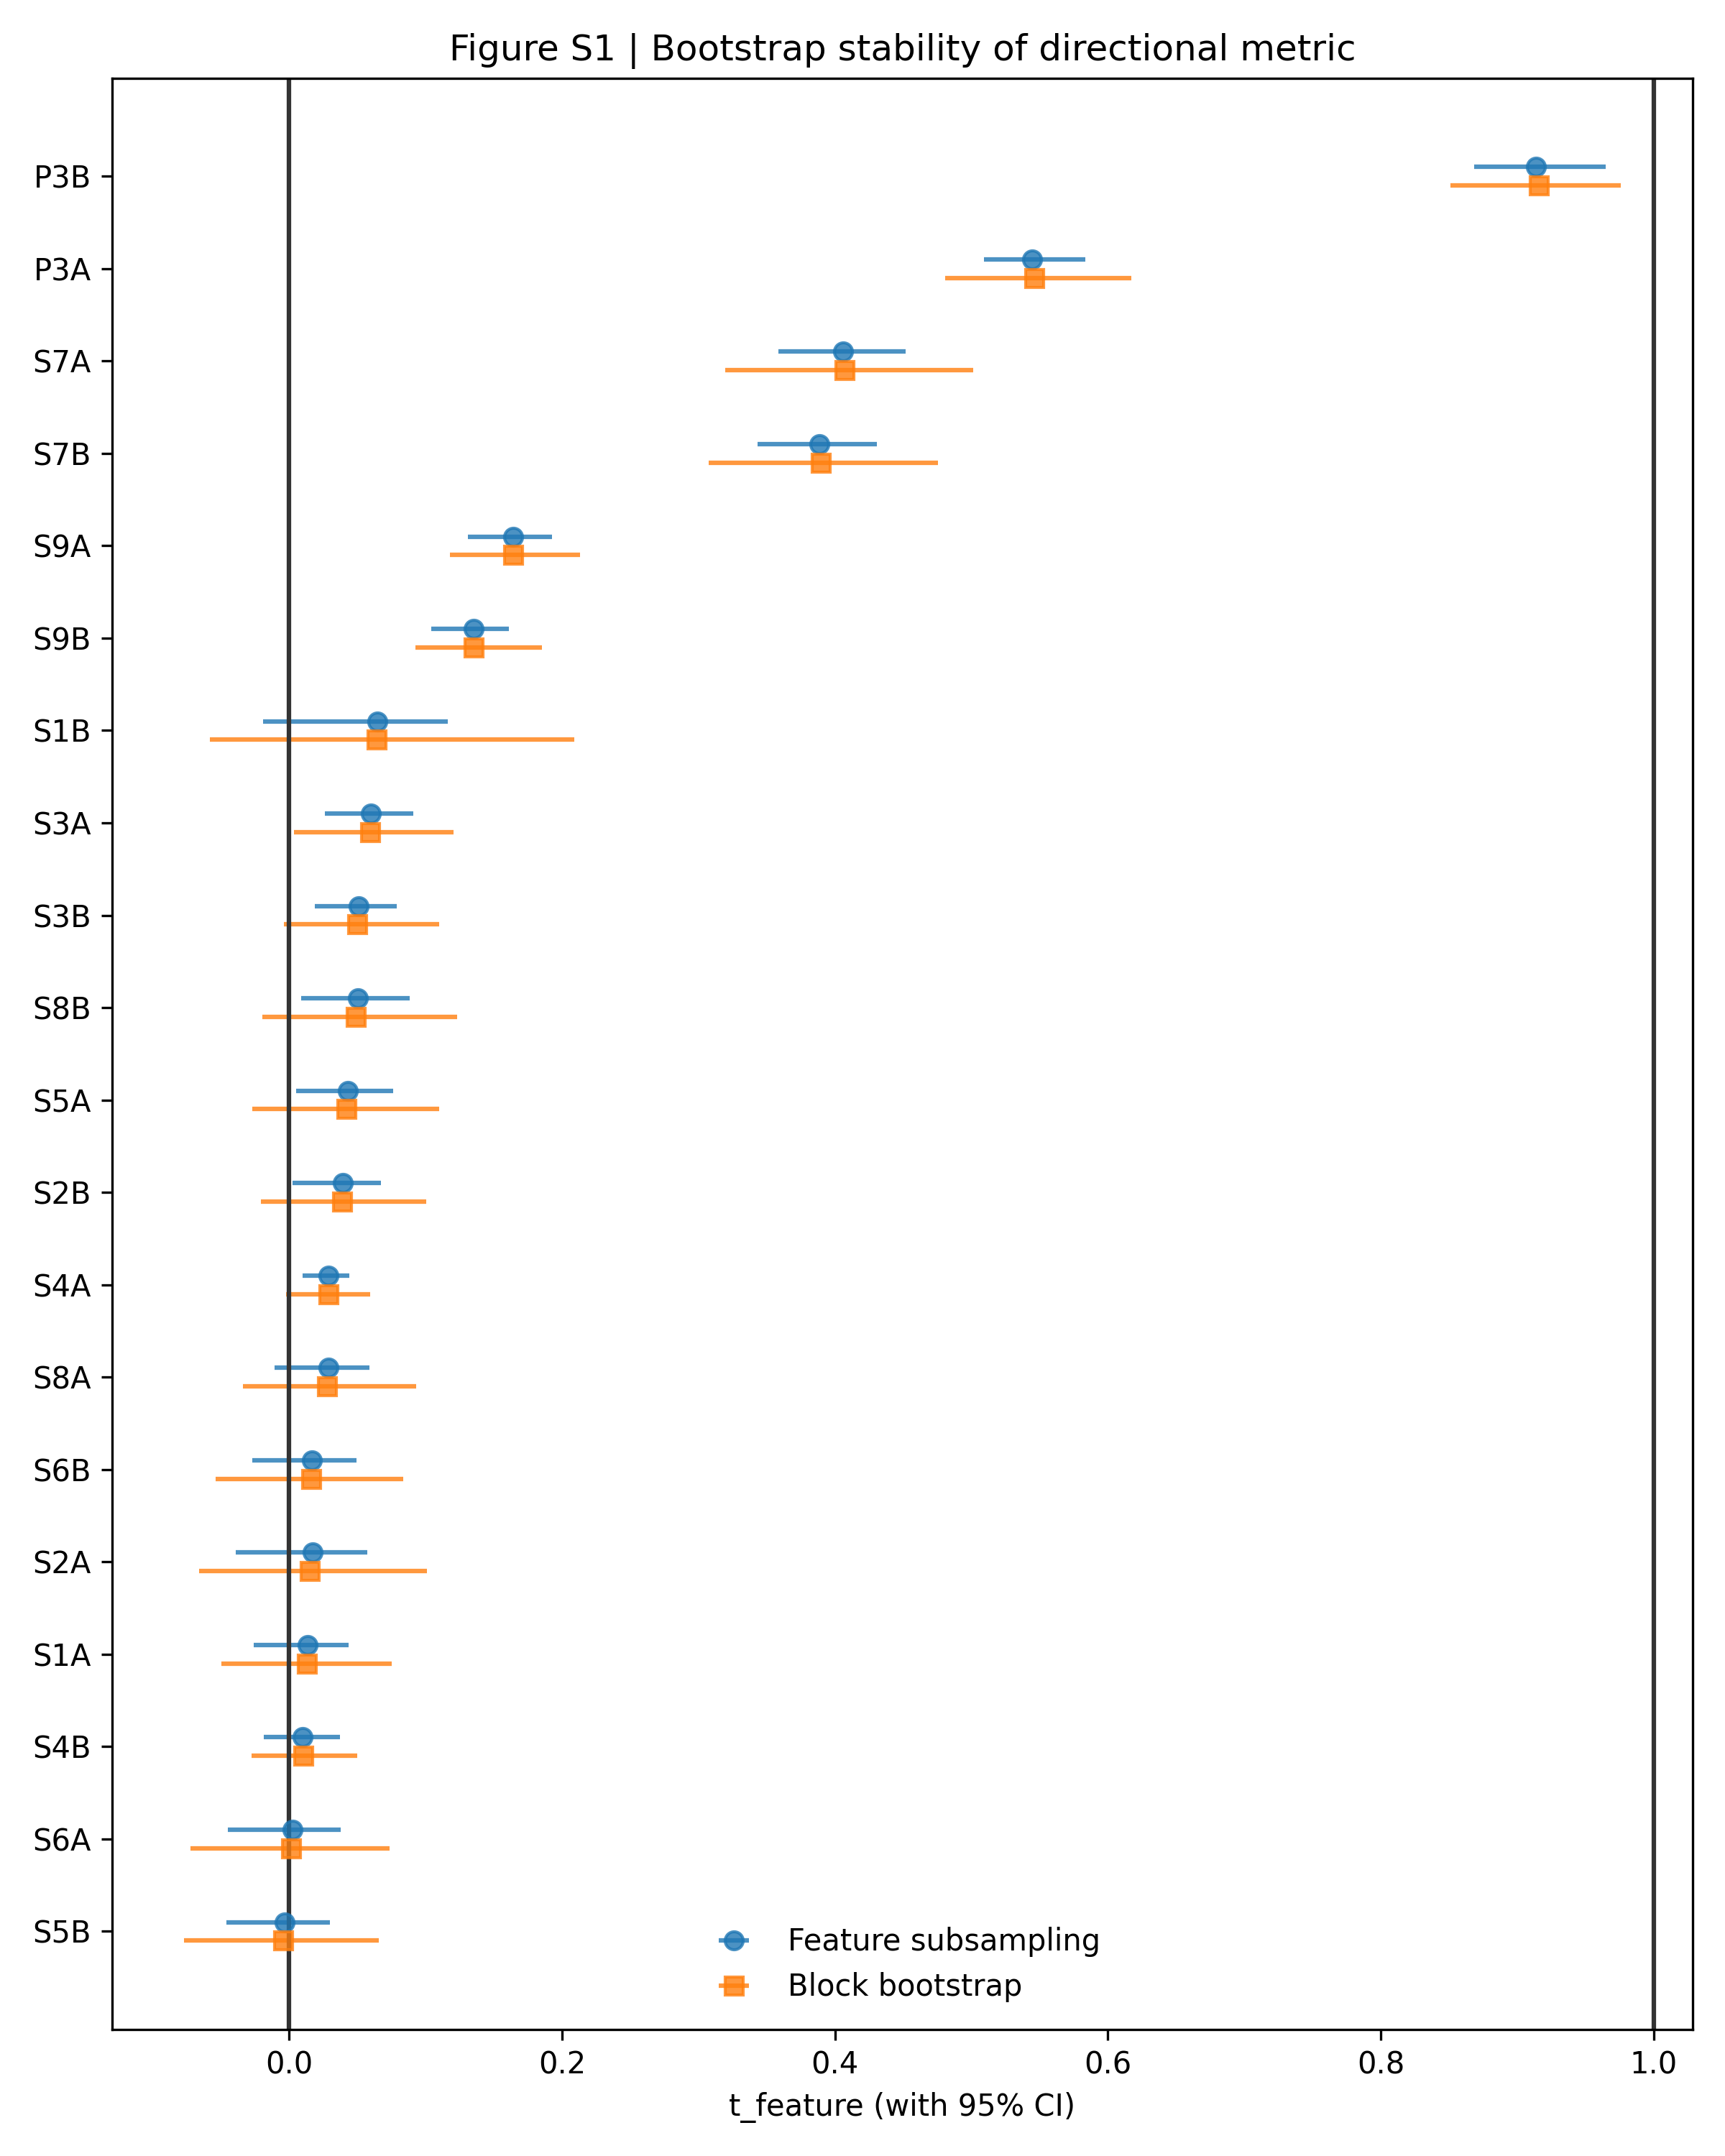


Confidence intervals were narrow for all supplements, and no major rank inversions were observed under resampling. These results confirm that directional positioning is not driven by small subsets of compounds or individual chemical classes.

**Table S1** Tentative identification by LC−TWIMS−HRMS of *C. sativus* secondary metabolites

| **Measured accurate mass** | **RT (min)** | **Ion assignment** | **Molecular formula** | **Accurate mass error (ppm)** | **Isotopic pattern match error (%)** | **MS/HRMS** | **CCS (Å2)** | **Putative identification** | **Identification confidence level** |
| --- | --- | --- | --- | --- | --- | --- | --- | --- | --- |
| **PHENOLIC COMPOUNDS** | | | | | | | | | |
| **Anthocyanins** | | | | | | | | | |
| 627.1561 | 1.39 | [M]+ | C27H31O17+ | 0.8 | 3.4 | 303.0497 | 244.46 | Delphinidin 3,5-O-diglucoside (Delphin) | 2 |
| 611.1614 | 2.29 | [M]+ | C27H31O16+ | 1.2 | 17.95 | 287.0547 | 239.47 | Cyanidin 3,5-O-diglucoside | 2 |
| 641.1719 | 2.39 | [M]+ | C28H33O17+ | 1.1 | 0.45 | 317.0654 | 248.99 | Petunidin 3,5-O-diglucoside (Petunin) | 2 |
| 465.1030 | 2.52 | [M]+ | C21H21O12+ | 0.5 | 1.98 | 257.0445 / 303.0497 | 204.42 | Delphinidin 3-O-glucoside | 2 |
| 595.1568 | 2.55 | [M]+ | C27H31O15+ | 0.0 | 7.77 | 271.0603 | 238.91 | Pelargonidin 3,5-O-diglucoside | 2 |
| 655.1874 | 2.65 | [M]+ | C29H35O17+ | 0.8 | 6.49 | 331.0813 / 353.0649 | 254.24 | Malvidin 3,5-diglucoside (Malvin) | 2 |
| 479.1186 | 2.80 | [M]+ | C22H23O12+ | 0.5 | 1.58 | 302.0419 / 317.0653 | 209.73 | Petunidin 3-O-glucoside | 2 |
| 493.1341 | 3.02 | [M]+ | C23H25O12+ | 0.1 | 14.12 | 331.0807 | 214.49 | Malvidin 3-O-glucoside (Oenin) | 2 |
| 271.0604 | 3.76 | [M]+ | C15H11O5+ | 1.3 | 7.91 | - | 155.38 | Pelargonidin | 3 |
| **Flavonols** | | | | | | | | | |
| 787.1949 | 2.50 | [M-H]- | C33H40O22 | 1.3 | 3.30 | 462.0808 / 625.1416 | 263.56 | Quercetin 3,7,4'-triglucoside | 2 |
| 771.1997 | 2.60 | [M-H]- | C33H40O21 | 1.0 | 2.65 | 284.0322 / 609.1457 | 273.92 | Kaempferol 3-O-sophoroside 7-O-glucoside | 2 |
| 755.2043 | 2.71 | [M-H]- | C33H40O20 | 0.4 | 1.61 | 446.0869 / 593.1520 | 274.21 | Kaempferol 3-O-sophoroside-7-O-rhamnoside | 2 |
| 625.1415 | 2.88 | [M-H]- | C27H30O17 | 0.7 | 7.53 | 271.0251 / 300.0264 / 301.0351 | 238.91 | Quercetin diglucoside isomer A | 3 |
| 609.1461 | 2.94 | [M-H]- | C27H30O16 | -0.1 | 1.21 | 283.0248 / 285.0403 / 447.0928 | 253.02 | Kaempferol-3,7-di-O-β-D-glucoside | 2 |
| 771.1994 | 2.98 | [M-H]- | C33H40O21 | 0.7 | 0.33 | 284.0324 / 285.0400 / 609.1462 | 271.10 | Kaempferol 3,7,4'-O-triglucoside | 2 |
| 593.1513 | 3.06 | [M-H]- | C27H30O15 | 0.1 | 2.49 | 325.0714 / 353.0665 / 383.0781 / 473.1091 / 503.1204 | 240.38 | Kaempferol diglycoside isomer | 3 |
| 625.1417 | 3.08 | [M-H]- | C27H30O17 | 1.1 | 4.49 | 301.0355 | 241.84 | Quercetin diglucoside isomer B | 3 |
| 651.1598 | 3.09 | [M-H]- | C29H32O17 | 4.8 | 12.69 | 284.0322 / 285.0400 / 446.0857 / 447.0919 | 260.48 | Kaempferol 3-(6''-acetylglycoside)-7-glycoside isomer A | 3 |
| 771.1997 | 3.20 | [M-H]- | C33H40O21 | 0.9 | 2.04 | 284.0325 / 285.0395 / 489.1070 / 651.1600 | 257.40 | Kaempferol triglucoside isomer | 3 |
| 625.1411 | 3.23 | [M-H]- | C27H30O17 | 0.2 | 1.55 | 255.0297 / 271.0245 / 301.0347 | 234.00 | Quercetin 3-O-sophoroside | 2 |
| 609.1459 | 3.26 | [M-H]- | C27H30O16 | -0.4 | 1.70 | 283.0247 / 285.0397 / 446.0851 / 447.0943 | 245.82 | Kaempferol 7-O-sophoroside | 2 |
| 663.1530 | 3.31 | [M+Na]+ | C28H32O17 | -0.3 | 7.99 | 317.0649 / 501.1001 | 247.21 | Isorhamnetin 3,7-diglucoside | 2 |
| 609.1466 | 3.41 | [M-H]- | C27H30O16 | 0.9 | 0.60 | 227.0351 / 255.0299 / 284.0327 | 232.98 | Kaempferol 3-O-sophoroside | 2 |
| 663.1526 | 3.45 | [M+Na]+ | C28H32O17 | -0.9 | 6.29 | 317.0655 | 248.99 | Isorhamnetin 3-O-sophoroside | 2 |
| 593.1511 | 3.57 | [M-H]- | C27H30O15 | -0.1 | 8.51 | 227.0350 / 255.0303 / 284.0329 / 285.0392 | 229.14 | Kaempferol 3-O-rutinoside | 2 |
| 623.1613 | 3.63 | [M-H]- | C28H32O16 | -0.7 | 2.52 | 243.0295 / 271.0248 / 285.0405 / 299.0194 / 314.0428 | 237.82 | Isorhamnetin 4'-neohesperidoside | 2 |
| 505.0990 | 3.73 | [M-H]- | C23H22O13 | 0.5 | 5.44 | 300.0274 / 301.0338 | 213.80 | Quercetin acetylhexoside isomer A | 3 |
| 623.1606 | 3.76 | [M-H]- | C28H32O16 | -1.8 | 18.81 | 315.0502 / 345.0611 | 236.53 | Isorhamnetin 3-O-rutinoside | 2 |
| 651.1563 | 3.82 | [M-H]- | C29H32O17 | -0.5 | 2.66 | 227.0352 / 255.0297 / 284.0324 / 285.0391 | 245.08 | Kaempferol 3-(6''-acetylglycoside)-7-glycoside isomer B | 3 |
| 447.0936 | 3.83 | [M-H]- | C21H20O11 | 0.7 | 0.34 | 227.0352 / 255.0298 / 284.0324 | 201.37 | Kaempferol 3-O-glucoside | 2 |
| 477.1037 | 3.91 | [M-H]- | C22H22O12 | -0.3 | 3.9 | 243.0297 / 257.0458 / 271.0249 / 285.0404 / 314.0430 | 209.41 | Isorhamnetin 3-O-glucoside | 2 |
| 447.0934 | 3.94 | [M-H]- | C21H20O11 | 0.2 | 16.08 | 257.0443 / 284.0332 / 285.0399 | 212.69 | Kaempferol 7-O-glucoside | 2 |
| 505.0987 | 3.94 | [M-H]- | C23H22O13 | -0.2 | 2.02 | 151.0033 / 257.0434 / 300.0270 / 301.0331 | 212.83 | Quercetin acetylhexoside isomer B | 3 |
| 447.0938 | 4.03 | [M-H]- | C21H20O11 | 1.0 | 10.65 | 284.0319 | 215.67 | Kaempferol hexoside isomer | 3 |
| 489.1041 | 4.21 | [M-H]- | C23H22O12 | 0.5 | 2.15 | 227.0349 / 255.0298 / 284.0332 / 285.0392 | 213.32 | Kaempferol 3-(6''-acetylglycoside) isomer | 3 |
| 301.0349 | 4.61 | [M-H]- | C15H10O7 | -1.4 | 5.73 | - | 162.76 () | Quercetin | 2 |
| 285.0404 | 5.10 | [M-H]- | C15H10O6 | 0.0 | 4.28 | 211.0401 / 255.0306 | 160.21 () | Kaempferol | 2 |
| 317.0651 | 5.21 | [M+H]+ | C16H12O7 | -1.5 | 3.94 | 153.0180 / 229.0507 | 167.23 | Isorhamnetin | 2 |
| **Flavones** | | | | | | | | | |
| 431.0981 | 3.57 | [M-H]- | C21H20O10 | -0.7 | 9.96 | 283.0611 / 311.0554 | 202.19 | Isovitexin (Apigenin 6-glucoside) | 2 |
| 593.1510 | 3.71 | [M-H]- | C27H30O15 | -0.4 | 2.33 | 284.0324 / 285.0396 | 233.31 | Luteolin 7-O-rutinoside | 2 |
| 593.1507 | 3.76 | [M-H]- | C27H30O15 | -0.8 | 1.77 | 269.0454 / 291.0293 | 232.69 | Apigenin diglucoside isomer | 3 |
| 431.0983 | 3.96 | [M-H]- | C21H20O10 | -0.1 | 8.98 | 268.0393 / 269.0443 | 208.89 | Apigenin 7-glucoside | 2 |
| 285.0398 | 4.60 | [M-H]- | C15H10O6 | -2.3 | 4.41 | - | 162.59 | Luteolin | 2 |
| **Flavanonols** | | | | | | | | | |
| 287.0556 | 4.18 | [M-H]- | C15H12O6 | -1.6 | 5.74 | - | 163.75 | Dihydrokaempferol | 2 |
| **Flavanones** | | | | | | | | | |
| 271.0610 | 5.06 | [M-H]- | C15H12O5 | -0.8 | 4.11 | - | 162.22 | Naringenin | 2 |
| **CROCINS** | | | | | | | | | |
| 1161.4211 | 3.61 | [M+Na]+ | C50H74O29 | 0.3 | 1.46 | 675.2627 / 837.3157 | 341.78 | *trans*-5-tG | 2 |
| 1161.4213 | 3.72 | [M+Na]+ | C50H74O29 | 0.4 | 0.66 | 675.2624 / 837.3144 | 335.93 | *trans*-5-nG | 2 |
| 1161.4206 | 3.85 | [M+Na]+ | C50H74O29 | -0.2 | 4.74 | 837.3150 | 350.28 | *cis*-5-tG | 2 |
| 975.3717 | 3.89 | [M-H]- | C44H64O24 | 0.2 | 1.14 | 239.1804 / 283.1702 / 327.1599 / 651.2653 | 329.10 | *trans*-crocin (*trans*-4-GG) | 2 |
| 975.3713 | 4.06 | [M-H]- | C44H64O24 | -0.2 | 1.20 | 283.1705 / 327.1599 / 651.2654 | 326.14 | *trans*-4-tg | 2 |
| 859.3242 | 4.17 | [M+FA-H]- | C38H54O19 | 0.1 | 0.72 | 283.1702 | 324.43 | *trans*-3-Gg | 2 |
| 975.3719 | 4.48 | [M-H]- | C44H64O24 | 0.4 | 14.72 | 239.1806 / 283.1706 / 327.1601 / 489.2130 / 651.2656 | 318.89 | *trans*-4-ng | 2 |
| 975.3721 | 4.59 | [M-H]- | C44H64O24 | 0.6 | 1.33 | 283.1702 / 327.1603 / 349.1421 / 651.2655 | 314.44 | Crocin isomer A | 3 |
| 1161.4213 | 4.64 | [M+Na]+ | C50H74O29 | 0.4 | 3.2 | 837.3152 | 341.04 | *cis*-5-nG | 2 |
| 1161.4207 | 4.81 | [M+Na]+ | C50H74O29 | -0.1 | 1.46 | 675.2625 | 334.62 | Crocetin diester pentaglycoside isomer A | 3 |
| 813.3190 | 4.91 | [M-H]- | C38H54O19 | 0.4 | 17.52 | 239.1803 / 283.1700 / 327.1598 / 349.1422 / 651.2656 | 295.81 | Crocin II isomer A | 3 |
| 1161.4209 | 4.93 | [M+Na]+ | C50H74O29 | 0.1 | 11.70 | 619.2361 / 837.3150 / 859.3570 / 1021.4250 | 349.18 | Crocetin diester pentaglycoside isomer B | 3 |
| 975.3723 | 5.02 | [M-H]- | C44H64O24 | 0.8 | 0.61 | 239.1804 / 283.1703 / 327.1600 / 651.2658 | 315.77 | *cis*-crocin (*cis*-4-GG) | 2 |
| 975.3717 | 5.15 | [M-H]- | C44H64O24 | 0.2 | 2.21 | 239.1803 / 283.1701 / 327.1599 / 349.1419 / 651.2654 | 323.54 | Crocin isomer B | 3 |
| 975.3720 | 5.26 | [M-H]- | C44H64O24 | 0.5 | 1.22 | 651.2656 | 318.45 | Crocin isomer C | 3 |
| 837.3148 | 5.34 | [M+Na]+ | C38H54O19 | -0.4 | 0.58 | 347.0942 / 513.2092 / 675.2623 | 297.62 | *cis*-3-Gg | 2 |
| 837.3139 | 5.48 | [M+Na]+ | C38H54O19 | -1.5 | 5.16 | 675.2627 | 303.99 | Crocin II isomer B | 3 |
| 651.2659 | 5.93 | [M-H]- | C32H44O14 | 0.1 | 0.78 | 239.1806 / 283.1705 / 327.1602 | 259.24 | *trans*-2-gg | 2 |
| 651.2660 | 6.03 | [M-H]- | C32H44O14 | 0.2 | 0.11 | 239.1807 / 283.1705 / 349.1421 | 268.55 | *trans*-2-G | 2 |
| 513.2094 | 6.50 | [M+Na]+ | C26H34O9 | -0.3 | 1.27 | 351.1570 | 229.33 | *trans*-1-g | 2 |
| 513.2095 | 6.57 | [M+Na]+ | C26H34O9 | 0.0 | 1.67 | 351.1572 | 231.92 | *cis*-1-g | 2 |
| **OTHERS** | | | | | | | | | |
| 369.1510 | 2.55 | [M+Na]+ | C16H26O8 | -2.7 | 18.22 | 121.1014 / 149.0960 / 167.1066 | 178.68 | Picrocrocinic acid | 2 |
| 353.1571 | 3.48 | [M+Na]+ | C16H26O7 | -0.1 | 1.26 | 123.1166 / 151.1108 / 233.1020 | 176.08 | Picrocrocin | 2 |

**Table S2** Stability of directional ranking across alternative imputation strategies. Directional scores (t_feature) were recalculated under zero baseline, half-minimum, and 5th-percentile-based imputation schemes. Rank concordance was quantified using Spearman’s ρ and Kendall’s τ. Top-3 and Top-5 overlap indicate the number of shared samples among the highest-ranked supplements.

| **method_A** | **method_B** | **spearman_rho** | **kendall_tau** | **top3_overlap** | **top5_overlap** |
| --- | --- | --- | --- | --- | --- |
| zero | halfmin | 0.792208 | 0.662338 | 3 | 5 |
| halfmin | q05 | 0.867871 | 0.731602 | 3 | 5 |
| zero | q05 | 0.751553 | 0.601732 | 3 | 5 |

Directional rankings were moderately to strongly correlated across imputation strategies (Spearman ρ = 0.75–0.87). Importantly, the top five supplements were preserved across all imputation schemes, indicating that primary conclusions are robust to reasonable preprocessing variation.
